# Supplementary material for: lncScore: alignment-free identification of long noncoding RNA from assembled novel transcripts
Source: PubMed Central journal article supplement (PMC5052565; doi:10.1038/srep34838), 2016-10-06
Supplement: srep34838-s1.pdf [file srep34838-s1.pdf]

# **IncScore: alignment-free identification of long noncoding RNA from assembled novel transcripts**

Jian Zhao<sup>1,2</sup>, Xiaofeng Song<sup>1,\*</sup>, Kai Wang<sup>2,3,\*</sup>

<sup>1</sup>Department of Biomedical Engineering, Nanjing University of Aeronautics and Astronautics, Nanjing 210016, China

<sup>2</sup>Zilkha Neurogenetic Institute, Keck School of Medicine, University of Southern California, Los Angeles, CA 90089, USA

<sup>3</sup>Division of Bioinformatics, Department of Preventive Medicine, Keck School of Medicine, University of Southern California, Los Angeles, CA 90089, USA

\*Corresponding authors: [xfsong@nuaa.edu.cn](mailto:xfsong@nuaa.edu.cn); [kaiwang@usc.edu](mailto:kaiwang@usc.edu)

Table S1. List of alignment-free methods for the classification of coding/noncoding

transcripts

| Method name | Algorithm           | Number of features | Programming language | Multithreading |
|-------------|---------------------|--------------------|----------------------|----------------|
| CPAT        | Logistic regression | 4                  | Python               | F              |
| CNCI        | SVM                 | 5                  | Python               | T              |
| PLEK        | SVM                 | 1,364              | Python               | T              |
| lncRNA-MFDL | Deep learning       | 138                | Python + MATLAB      | F              |
| lncScore    | Logistic regression | 11                 | Python               | T              |

T represents 'True', and F represents 'False'.

Table S2. Numbers of the protein-coding and long noncoding transcripts in the testing dataset

of other species

|            | Protein-coding transcripts | Long noncoding transcripts |
|------------|----------------------------|----------------------------|
| Zebrafish  | 2711                       | 2711                       |
| Fruitfly   | 2723                       | 2723                       |
| C. elegans | 1615                       | 1615                       |
| Rat        | 3163                       | 3163                       |
| Sheep      | 2009                       | 2009                       |

For long noncoding transcripts, only those transcripts labeled with “lncRNA”, “ncRNA”, “antisense”, “sense\_intronic”, “sense\_overlapping”, or “processed\_transcript” were selected, and the same number of protein coding transcripts were randomly selected from the transcripts labeled with “ensemble:known”, “flybase:known”, or “wormbase:known”. All of the transcripts were derived from the Ensembl database (release 82).

Table S3. Comparison of the running time of CPAT, PLEK and IncScore for building a classification model

|    | CPAT  | PLEK     | IncScore |                  |         |
|----|-------|----------|----------|------------------|---------|
|    | LR    | SVM-RBF  | LR       | LR <sup>12</sup> | SVM-RBF |
| HT | 0.228 | 309.667  | 1.448    | 0.217            | 53.150  |
| MT | 0.880 | 2657.485 | 7.926    | 0.901            | 481.838 |

Running time (minutes) was test on the human (HT) and mouse (MT) training datasets.

LR represents logistic regression, and LR<sup>12</sup> indicates that LR model was built with 12 threads running.

Table S4. AUC (%) comparison of LR and SVM-RBF model

|          |         | HP    | HF    | MP    | MF    |
|----------|---------|-------|-------|-------|-------|
| IncScore | LR      | 95.47 | 98.60 | 96.63 | 99.05 |
|          | SVM-RBF | 94.73 | 98.41 | 95.89 | 99.02 |

The performance of LR and SVM-RBF model was evaluated using AUC on the Partial Testing Datasets (HP & MP) and the Full Testing Datasets (HF & MF) of human and mouse species.

The best c and g for human/mouse SVM-RBF model are 8192/32768 and 0.03125/0.03125.

Table S5. Comparison of LR, libSVM and libD3C on AUC, training & testing time (seconds)

|               |        | HP     | HF     | MP     | MF     |
|---------------|--------|--------|--------|--------|--------|
| AUC           | LR     | 0.955  | 0.986  | 0.966  | 0.990  |
|               | libSVM | 0.762  | 0.798  | 0.807  | 0.847  |
|               | libD3C | 0.947  | 0.985  | 0.961  | 0.992  |
| Training time | LR     | 0.12   | 0.14   | 0.59   | 0.7    |
|               | libSVM | 17.01  | 18.3   | 310.91 | 315.74 |
|               | libD3C | 24.29  | 23.18  | 286.41 | 290.21 |
| Testing time  | LR     | 0.21   | 0.25   | 0.09   | 0.14   |
|               | libSVM | 58.07  | 73.7   | 69.69  | 69.17  |
|               | libD3C | 127.11 | 161.71 | 74.83  | 73.56  |

The performance was evaluated on the Partial Testing Datasets (HP & MP) and the Full Testing Datasets (HF & MF) of human and mouse species. The LR, libSVM, and libD3C models were trained and tested by using the latest Weka 3, which is a data mining software in java. The time taken to calculate features of transcripts was not included in the training and testing time.

Table S6. Performance (%) comparison on the testing dataset

|             |                | CPAT        | CNCI           | PLEK   | lncScore <sup>1</sup> | lncScore <sup>2</sup> |        |
|-------------|----------------|-------------|----------------|--------|-----------------------|-----------------------|--------|
| Human       | Partial-length | Cutoff      | 0.364          | 0      | 0                     | 0.4555                | 0.5654 |
|             |                | Accuracy    | 84.03          | 80.51  | 63.14                 | 89.73                 | 89.12  |
|             |                | Sensitivity | 76.19          | 65.40  | 31.76                 | 87.47                 | 84.15  |
|             |                | PPV         | 92.12          | 96.46  | 94.83                 | 92.62                 | 94.61  |
|             |                | Specificity | 92.75          | 97.33  | 98.07                 | 92.24                 | 94.67  |
|             |                | NPV         | 77.78          | 71.65  | 56.36                 | 86.86                 | 84.29  |
|             |                | MCC         | 69.41          | 65.36  | 39.07                 | 79.60                 | 78.85  |
|             | Full-length    | Accuracy    | 94.41          | 92.20  | 90.61                 | 94.89                 | 95.21  |
|             |                | Sensitivity | 94.97          | 89.00  | 85.96                 | 96.54                 | 95.56  |
|             |                | PPV         | 95.46          | 98.16  | 98.62                 | 95.23                 | 96.64  |
|             |                | Specificity | 92.75          | 97.33  | 98.07                 | 92.24                 | 94.67  |
|             |                | NPV         | 92.00          | 84.64  | 81.31                 | 94.33                 | 92.99  |
|             |                | MCC         | 87.59          | 84.55  | 81.96                 | 89.18                 | 89.93  |
|             |                | Mouse       | Partial-length | Cutoff | 0.44                  | 0                     | 0      |
| Accuracy    | 79.04          |             |                | 76.47  | 50.07                 | 91.75                 | 89.92  |
| Sensitivity | 72.88          |             |                | 69.24  | 35.34                 | 93.56                 | 88.39  |
| PPV         | 97.97          |             |                | 98.05  | 90.91                 | 95.08                 | 97.61  |
| Specificity | 95.88          |             |                | 96.23  | 90.35                 | 86.77                 | 94.08  |
| NPV         | 56.40          |             |                | 63.37  | 33.82                 | 83.15                 | 74.78  |
| MCC         | 61.15          |             |                | 58.02  | 25.21                 | 79.27                 | 77.27  |
| Full-length | Accuracy       |             | 94.65          | 92.83  | 83.67                 | 95.44                 | 96.46  |
|             | Sensitivity    |             | 94.19          | 91.56  | 81.17                 | 98.68                 | 97.35  |
|             | PPV            |             | 98.39          | 98.48  | 95.75                 | 95.23                 | 97.78  |
|             | Specificity    |             | 95.88          | 96.23  | 90.35                 | 86.77                 | 94.08  |
|             | NPV            |             | 86.05          | 80.98  | 64.18                 | 96.09                 | 92.99  |
|             | MCC            |             | 87.21          | 83.52  | 65.47                 | 88.33                 | 91.10  |

lncScore<sup>1</sup> represents lncScore using the cutoff score with the best accuracy against the partial-length testing datasets, while lncScore<sup>2</sup> represents lncScore using the cutoff score with the best accuracy against the full-length testing datasets.

Figure S1. Processes of building the human training and testing datasets used in lncScore.

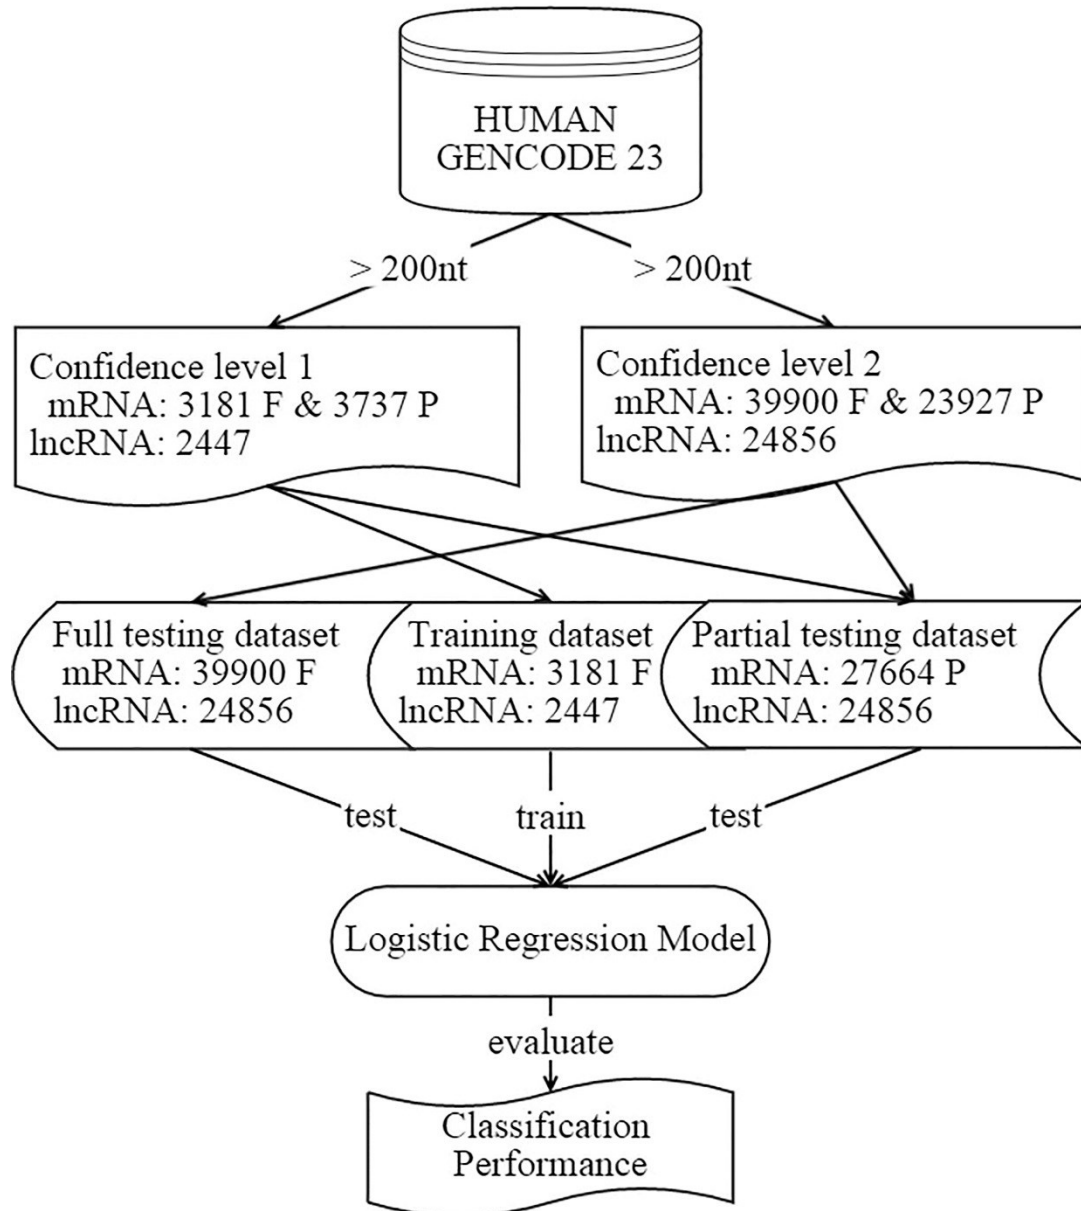

*F* represents full-length transcripts, and *P* represents partial-length transcripts.



Figure S2. Processes of building the mouse training and testing datasets used in lncScore.

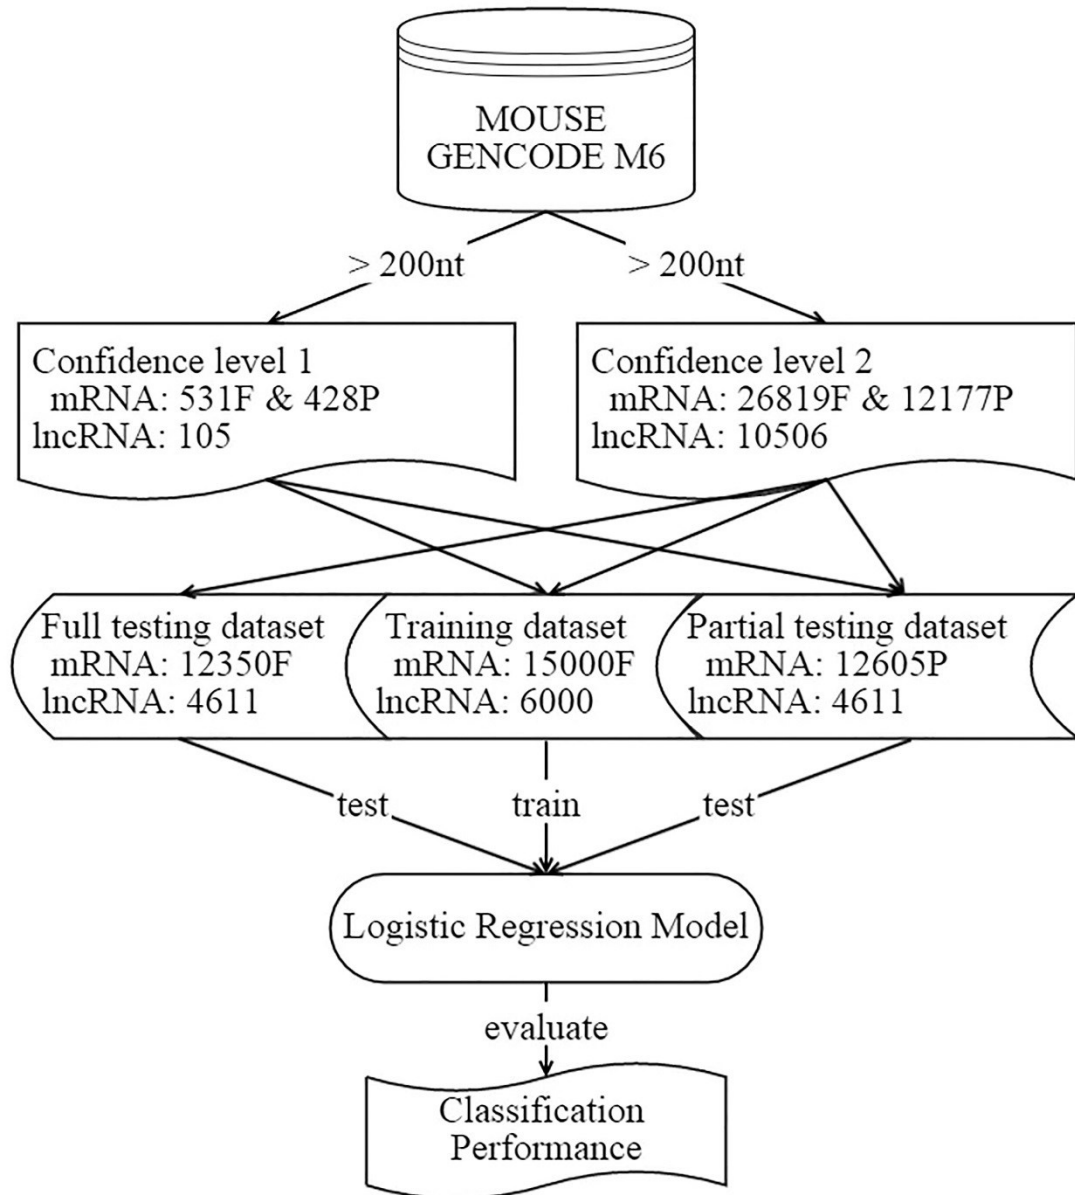

F represents full-length transcripts, and P represents partial-length transcripts.

Figure S3. ROC curves of 10-fold cross validation using different feature groups on the training datasets

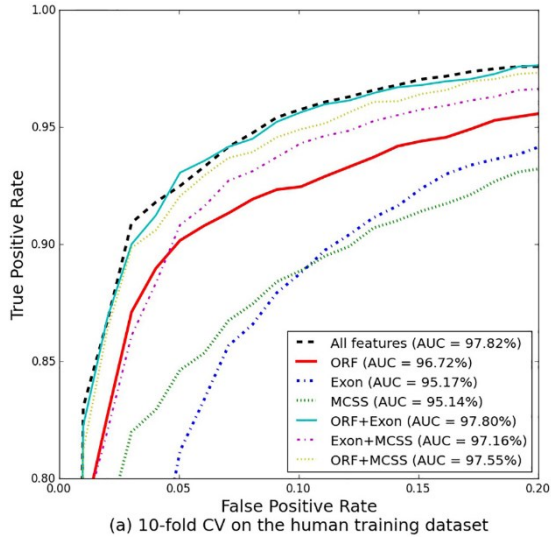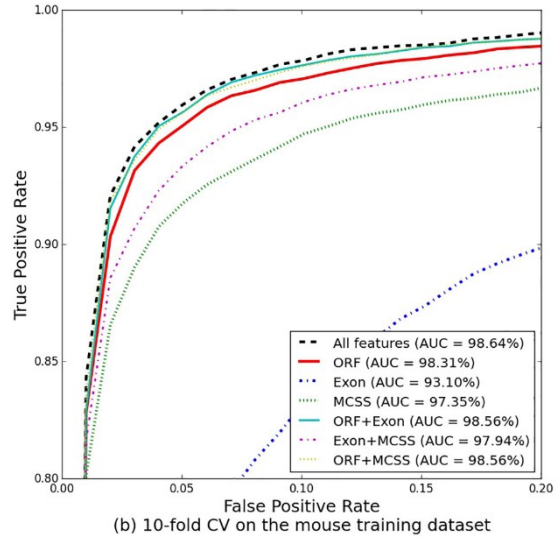

Figure S4. The contribution of each feature to the final performance of IncScore on each

testing datasets

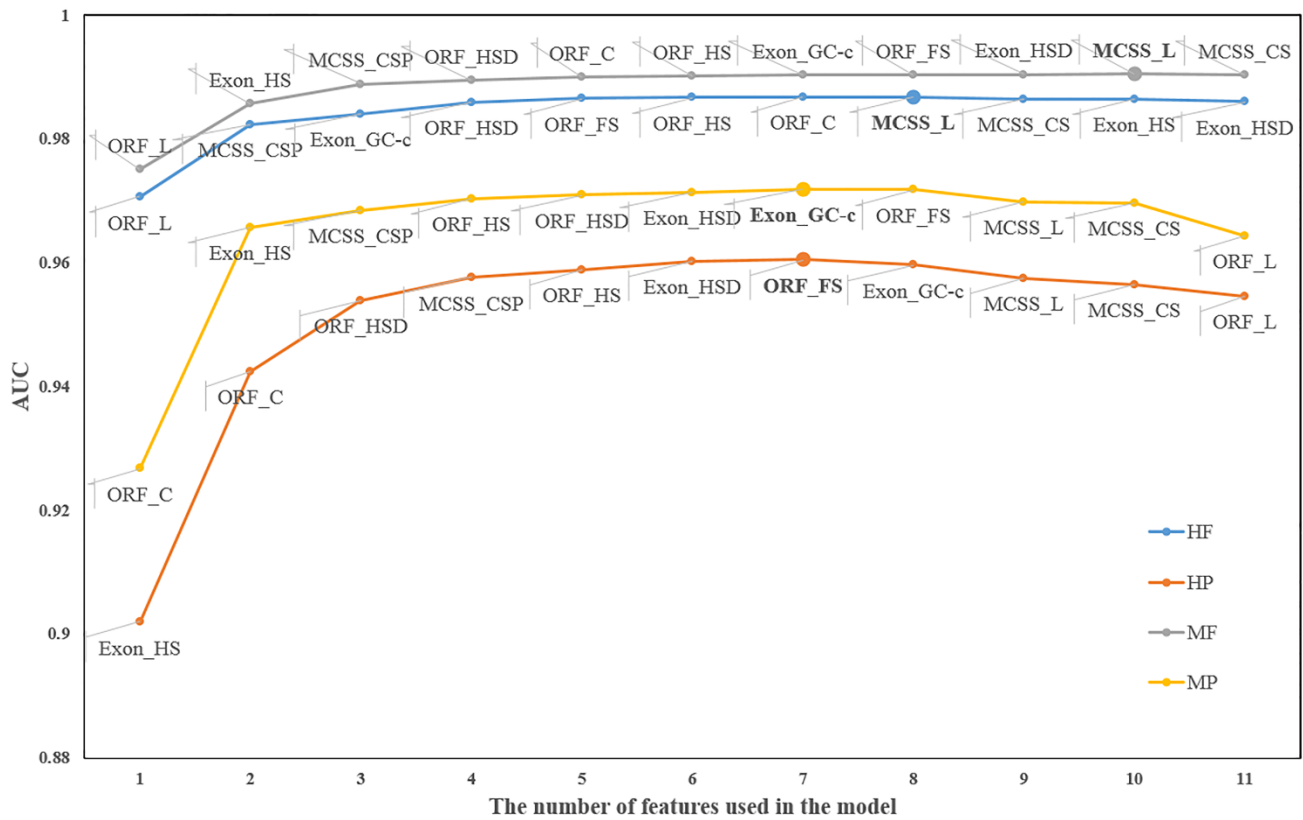

The feature with the biggest performance increases (or the smallest performance decreases) was added to the logistic model each time. Then performance was evaluated using AUC on the Partial Testing Datasets (HP & MP) and the Full Testing Datasets (HF & MF) of human and mouse species, individually. The full name of the abbreviation of each feature was shown in the Table 1.

The maximum AUC on each testing datasets was labeled with a larger dot.

Figure S5. Running time of IncScore with different threads

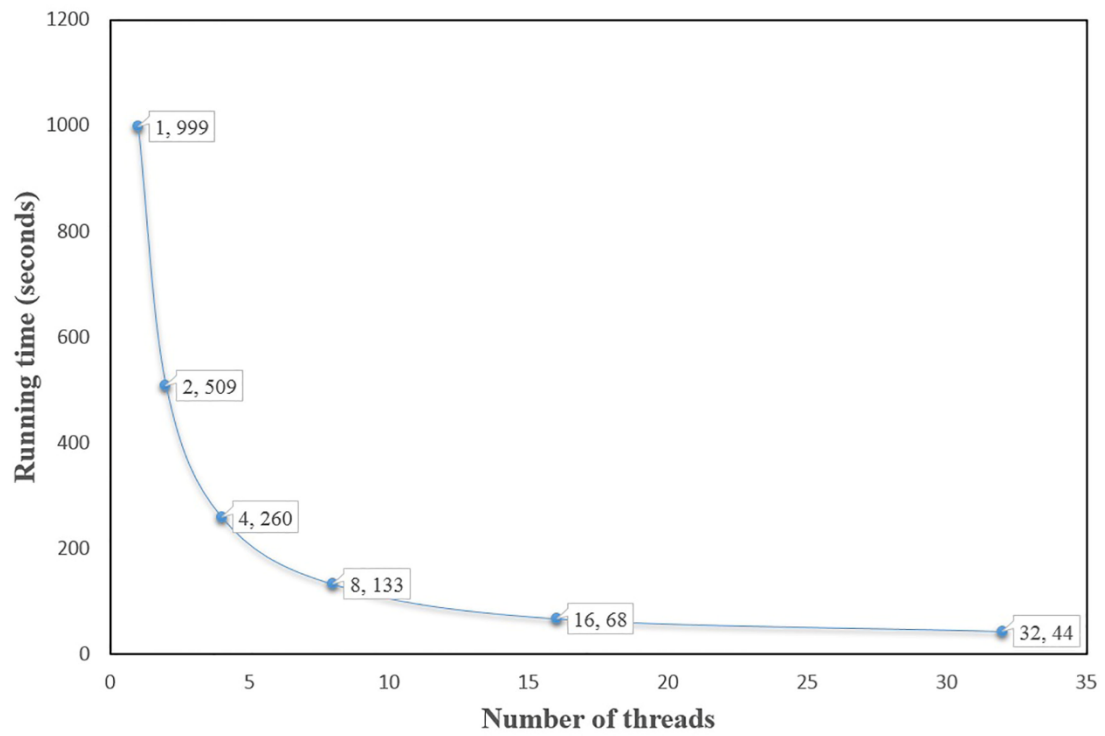

The total computing time of IncScore was measured on the human full-length testing dataset with four 3.30GHz Intel Xeon E5-4627 processors, 1 TB memory and Linux operating system.
